# Supplementary material
Source: PubMed Central journal article supplement (PMC3462481)
Supplement: supp_12-9669_IOVS-12-9669-s01.pdf [file supp_12-9669_IOVS-12-9669-s01.pdf]

## SUPPLEMENTARY MATERIAL

**Table S1:** Overview of genes included on PCR arrays\*

| <b>Assay</b>                | <b>Functional Group</b>            | <b>Fold-Change</b> | <b>P-Value</b> |
|-----------------------------|------------------------------------|--------------------|----------------|
| 18S-Hs99999901_s1           | Control                            | -1.23              | 0.69           |
| Acta2-Mm01546133_m1         | Control                            | -1.19              | 0.87           |
| Actb-Mm00607939_s1          | Control                            | 1.21               | 0.51           |
| Anxa5-Mm00477537_m1         | Apoptosis Signaling                | 1.04               | 0.86           |
| Atf4-Mm00515324_m1          | UPR                                | 1.65               | 0.23           |
| Atf6-Mm01295317_m1          | UPR                                | 1.06               | 0.79           |
| Atm-Mm01177457_m1           | DNA Damage and Repair              | -1.51              | 0.15           |
| Bax-Mm00432050_m1           | Apoptosis Signaling                | 1.20               | 0.13           |
| Bcl2l1-Mm00437783_m1        | Apoptosis Signaling                | 1.46               | 0.31           |
| Casp1-Mm00438023_m1         | Apoptosis Signaling                | 1.52               | 0.36           |
| Casp8-Mm00802247_m1         | Apoptosis Signaling                | 1.05               | 0.89           |
| Ccnc-Mm00443919_m1          | Proliferation and Carcinogenesis   | -1.11              | 0.50           |
| Ccnd1-Mm00432359_m1         | Proliferation and Carcinogenesis   | 6.28               | 0.02           |
| Ccng1-Mm00438084_m1         | Proliferation and Carcinogenesis   | 1.33               | 0.25           |
| Cdh1-Mm01247357_m1          | EMT                                | -1.30              | 0.85           |
| Cdh2-Mm00483213_m1          | EMT                                | -1.26              | 0.32           |
| Cdkn1a-Mm00432448_m1        | Growth Arrest and Senescence       | 2.31               | 0.13           |
| Chek2-Mm00443844_m1         | DNA Damage and Repair              | 1.34               | 0.42           |
| Col8a2-Mm02344867_g1        | Other                              | -1.53              | 0.27           |
| Cryab-Mm00515567_m1         | Oxidative and Metabolic Stress     | -1.26              | 0.41           |
| Cyp1a1-Mm00487218_m1        | Oxidative and Metabolic Stress     | 1.43               | 0.39           |
| Cyp1b1-Mm00487229_m1        | Oxidative and Metabolic Stress     | 1.39               | 0.71           |
| Cyp2a4;Cyp2a5-Mm00487248_g1 | Oxidative and Metabolic Stress     | 1.06               | 0.93           |
| Cyp2b10-Mm01972453_s1       | Oxidative and Metabolic Stress     | -2.30              | 0.37           |
| Cyp2b9-Mm00657910_m1        | Oxidative and Metabolic Stress     | -                  | -              |
| Cyp2c29-Mm00725580_s1       | Oxidative and Metabolic Stress     | -2.57              | 0.33           |
| Cyp3a11-Mm00731567_m1       | Oxidative and Metabolic Stress     | -                  | -              |
| Cyp4a10-Mm01622743_g1       | Oxidative and Metabolic Stress     | -2.54              | 0.31           |
| Cyp4a14-Mm00484132_m1       | Oxidative and Metabolic Stress     | -                  | -              |
| Cyp7a1-Mm00484152_m1        | Oxidative and Metabolic Stress     | -                  | -              |
| Ddit3-Mm00492097_m1         | UPR / Growth Arrest and Senescence | 2.14               | 0.01           |
| Derl2-Mm00504288_m1         | UPR                                | 1.08               | 0.76           |
| Dnaja1;Smu1-Mm00787254_s1   | UPR / Heat Shock                   | -1.79              | 0.08           |
| E2f1-Mm00432936_m1          | Proliferation and Carcinogenesis   | 3.43               | 0.05           |
| Edem1-Mm00551797_m1         | UPR                                | 1.22               | 0.30           |
| Edem3-Mm01295448_m1         | UPR                                | -1.08              | 0.79           |
| Egr1-Mm00656724_m1          | Proliferation and Carcinogenesis   | 9.28               | 0.06           |
| Ephx2-Mm00514706_m1         | Oxidative and Metabolic Stress     | -2.15              | 0.08           |
| Ercc1-Mm00468337_m1         | DNA Damage and Repair              | 1.03               | 0.89           |
| Ercc4-Mm00516619_m1         | DNA Damage and Repair              | -1.22              | 0.08           |
| Ero1lb-Mm00470754_m1        | UPR                                | -4.22              | 0.25           |
| FasI-Mm00438864_m1          | Apoptosis Signaling                | 2.29               | 0.10           |
| Fmo1-Mm00515795_m1          | Oxidative and Metabolic Stress     | 1.26               | 0.38           |
| Fmo4-Mm00467393_m1          | Oxidative and Metabolic Stress     | -1.59              | 0.22           |

|                        |                                  |       |      |
|------------------------|----------------------------------|-------|------|
| Fmo5-Mm00515805_m1     | Oxidative and Metabolic Stress   | -1.81 | 0.09 |
| Gadd45a-Mm00432802_m1  | Growth Arrest and Senescence     | -1.08 | 0.88 |
| Gapdh-Mm99999915_g1    | Control                          | -1.21 | 0.59 |
| Gclc-Mm00802655_m1     | Oxidative and Metabolic Stress   | 1.46  | 0.30 |
| Gclm-Mm00514996_m1     | Oxidative and Metabolic Stress   | 1.19  | 0.17 |
| Gpx1-Mm00656767_g1     | Oxidative and Metabolic Stress   | 1.37  | 0.39 |
| Gpx2-Mm00850074_g1     | Oxidative and Metabolic Stress   | -2.49 | 0.30 |
| Gsr-Mm00833903_m1      | Oxidative and Metabolic Stress   | 1.02  | 0.96 |
| Gstm1-Mm00833915_g1    | Oxidative and Metabolic Stress   | -2.03 | 0.15 |
| Gstm3-Mm00833923_m1    | Oxidative and Metabolic Stress   | -     | -    |
| Gusb-Mm00446953_m1     | Control                          | -1.07 | 0.58 |
| Herpud1-Mm00445600_m1  | UPR                              | 1.41  | 0.29 |
| Hmox1-Mm00516005_m1    | Oxidative and Metabolic Stress   | 5.30  | 0.03 |
| Hmox2-Mm00468921_m1    | Oxidative and Metabolic Stress   | -     | -    |
| Hprt1-Mm00446968_m1    | Control                          | 1.09  | 0.53 |
| Hsf1-Mm01201402_m1     | Heat Shock                       | -1.10 | 0.74 |
| Hsp90ab1-Mm00833431_g1 | Heat Shock                       | 1.10  | 0.76 |
| Hspa1b-Mm03038954_s1   | Heat Shock                       | 1.13  | 0.87 |
| Hspa1l-Mm00442854_m1   | UPR / Heat Shock                 | -2.38 | 0.03 |
| Hspa4-Mm00434038_m1    | Heat Shock                       | -1.29 | 0.01 |
| Hspa5-Mm01333323_g1    | UPR / Heat Shock                 | 1.96  | 0.04 |
| Hspa8-Mm01731394_gH    | Heat Shock                       | 1.10  | 0.79 |
| Hspb1-Mm00834384_g1    | Heat Shock                       | -1.16 | 0.66 |
| Hspd1-Mm00849835_g1    | Heat Shock                       | -1.14 | 0.69 |
| Hspe1-Mm00434083_m1    | Heat Shock                       | 1.00  | 0.99 |
| Igfbp6-Mm00599696_m1   | Growth Arrest and Senescence     | 1.89  | 0.12 |
| Mdm2-Mm01233136_m1     | Growth Arrest and Senescence     | 1.12  | 0.67 |
| Mt2-Mm00809556_s1      | Oxidative and Metabolic Stress   | -1.50 | 0.09 |
| Nfe2l2-Mm00477784_m1   | Oxidative and Metabolic Stress   | 1.09  | 0.80 |
| Nfkbia-Mm00477798_m1   | Apoptosis Signaling              | 1.17  | 0.58 |
| Nqo1-Mm00500821_m1     | Oxidative and Metabolic Stress   | -1.28 | 0.47 |
| Pcna-Mm00448100_g1     | Proliferation and Carcinogenesis | -1.06 | 0.75 |
| Polr2k-Mm01164490_g1   | Oxidative and Metabolic Stress   | -1.35 | 0.45 |
| Por-Mm00435876_m1      | Oxidative and Metabolic Stress   | -1.04 | 0.91 |
| Rad23a-Mm00833569_m1   | DNA Damage and Repair            | 1.07  | 0.82 |
| Rad50-Mm00485504_m1    | DNA Damage and Repair            | -1.28 | 0.39 |
| Snai1-Mm00441533_g1    | EMT                              | 1.12  | 0.77 |
| Snai2-Mm00441531_m1    | EMT                              | 1.35  | 0.59 |
| Sod1-Mm01700393_g1     | Oxidative and Metabolic Stress   | -1.17 | 0.10 |
| Sod2-Mm00449726_m1     | Oxidative and Metabolic Stress   | -1.23 | 0.37 |
| Tcf4-Mm00443210_m1     | Other                            | -1.27 | 0.45 |
| Tnfrsf1a-Mm00441875_m1 | Apoptosis Signaling              | 1.33  | 0.17 |
| Tnfsf10-Mm01283606_m1  | Apoptosis Signaling              | 1.22  | 0.56 |
| Tradd-Mm01251031_g1    | Apoptosis Signaling              | -1.11 | 0.52 |
| Trp53-Mm01731287_m1    | Growth Arrest and Senescence     | -1.10 | 0.79 |

|                      |                       |       |      |
|----------------------|-----------------------|-------|------|
| Twist1-Mm00442036_m1 | EMT                   | 1.36  | 0.06 |
| Ugt1a2-Mm01964656_s1 | DNA Damage and Repair | -1.69 | 0.57 |
| Ung-Mm00449156_m1    | DNA Damage and Repair | 2.78  | 0.01 |
| Xrcc1-Mm00494229_m1  | DNA Damage and Repair | -1.04 | 0.87 |
| Xrcc2-Mm00445118_m1  | DNA Damage and Repair | -1.65 | 0.00 |
| Xrcc4-Mm00459213_m1  | DNA Damage and Repair | -1.39 | 0.28 |
| Zeb1-Mm00495564_m1   | EMT                   | -1.10 | 0.49 |

\*Genes were assigned to eight functional groups or the control group as indicated in second column. Genes were marked as “other” if no special assignment to one of these groups could be made. Mean data from n=3 customized arrays per *Col8a2*<sup>Q455K/Q455K</sup> mutant or wildtype strain are presented. Third and fourth columns show fold-change values and p-values of gene expression in 12 month-old *Col8a2*<sup>Q455K/Q455K</sup> mutant compared to wildtype mice or “-” if no transcriptional expression could be detected. Fold-change >1 indicates overexpression and fold-change <-1.0 indicates underexpression in mutant compared to wild-type mice. Gene expression was normalized to the mean expression level of 18S, Actb, Gusb and Hprt1. UPR: Unfolded Protein Response, EMT: Epithelial Mesenchymal Transition.
